# Supplementary material
Source: PubMed Central journal article supplement (PMC5869471)
Supplement: JB.00671-17_zjb999094689s2.pdf [file JB.00671-17_zjb999094689s2.pdf]

## Supplemental Material

**Table S2. Allele sequences used for mutation and complementation in this work.**

***clpP<sup>Tag</sup> (EcoRI-start-clpP(Δ2–9)-HIS<sub>6</sub>-TEV-MYC<sub>3</sub> tag-stop-BamHI)***

---

GGCCCGCGAATTCATGGCTTTAGTGCCTATGGTGATCGAACAGACTGCTAAAGGT  
GAACGCTCATTGATATTTATTCTCGTTTGTAAAAGAGCGGATTATCTTTTTAGTGG  
GCCAAGTAGAAGAGCATATGGCGAATCTGATTGTGGCGCAGTTACTATTCCTTGAG  
TCAGAAAGCCCTGACAAGGATATTTTCTTATATATCAACTCACCTGGTGGCTCTGTT  
ACCGCGGGTATGGCAATTTACGACACCATGCAGTTTATTAAGCCTAATGTGAGCAC  
TGTGTGTATTGGCCAAGCGGCTAGCATGGGTGCATTTTTATTAGCGGGTGGTGAAA  
AGGGCAAGCGTTTCTGCTTACCTAATTCGCGCGTTATGATCCATCAACCTTTGGGT  
GGTTTCCAAGGTCAGGCTTCTGATATCGCGATTTCATGCTCAAGAGATTTTGGGCAT  
TAAGAATAAACTGAACCAGATGTTAGCTGATCATACTGGACAACCCCTCGAAGTAA  
TTGAGCGTGATACCGATCGTGACAACCTTCATGAGTGCTACTCAAGCTGTAGAATAT  
GGTTTAGTTGACGCAGTGATGACTAAACGCGGCGATTCTATCTTAACTCACCGTAA  
CCGTTCTCACCATCACCATCACCATGGTGGTGAAAACTTATACTTCCAAGGTGCAT  
ACACCTCTGGCGAGCAAAGTTAATCTCTGAAGAAGATTTAAATGGAGAACAAAA  
TTAATCTCTGAAGAAGATTTAAACGGTGAACAAAAATTAATCTCTGAGGAAGATCTG  
AACTGAGGATCCGGCTC

***clpP<sup>Trap</sup> (EcoRI-start-clpP(Δ2–9,S106A)-HIS<sub>6</sub>-TEV-MYC<sub>3</sub> tag-stop-BamHI)***

---

GGCCCGCGAATTCATGGCTTTAGTGCCTATGGTGATCGAACAGACTGCTAAAGGT  
GAACGCTCATTGATATTTATTCTCGTTTGTAAAAGAGCGGATTATCTTTTTAGTGG  
GCCAAGTAGAAGAGCATATGGCGAATCTGATTGTGGCGCAGTTACTATTCCTTGAG  
TCAGAAAGCCCTGACAAGGATATTTTCTTATATATCAACTCACCTGGTGGCTCTGTT  
ACCGCGGGTATGGCAATTTACGACACCATGCAGTTTATTAAGCCTAATGTGAGCAC

TGTGTGTATTGGCCAAGCGGCTGCCATGGGTGCATTTTTATTAGCGGGTGGTGAAA  
AGGGCAAGCGTTTCTGCTTACCTAATTCGCGCGTTATGATCCATCAACCTTTGGGT  
GGTTTCCAAGGTCAGGCTTCTGATATCGCGATTCATGCTCAAGAGATTTTGGGCAT  
TAAGAATAAACTGAACCAGATGTTAGCTGATCATACTGGACAACCCCTCGAAGTAA  
TTGAGCGTGATACCGATCGTGACAACCTTCATGAGTGCTACTCAAGCTGTAGAATAT  
GGTTTAGTTGACGCAGTGATGACTAAACGCGGCGGATTCTATCTTAACTCACCGTAA  
CCGTTCTCACCATCACCATCACCATGGTGGTGAAAACTTATACTTCCAAGGTGCAT  
ACACCTCTGGCGAGCAAAAGTTAATCTCTGAAGAAGATTTAAATGGAGAACAAAAA  
TTAATCTCTGAAGAAGATTTAAACGGTGAACAAAAATTAATCTCTGAGGAAGATCTG  
AACTGAGGATCCGGCTC
